# Supplementary material
Source: PubMed Central journal article supplement (PMC4707106)
Supplement: NIHMS737610-supplement-5.pdf [file NIHMS737610-supplement-5.pdf]

| Cell Line           | ALK Status   | MYCN status   | IC <sub>50</sub> (nM) |                   | Fold |
|---------------------|--------------|---------------|-----------------------|-------------------|------|
|                     |              |               | Crizotinib            | PF-06463922       |      |
| <b>NB-1643</b>      | R1275Q       | Amplified     | <b>308.4 ± 80.7</b>   | <b>6.1 ± 0.3</b>  | 51   |
| <b>LAN-5</b>        | R1275Q       | Amplified     | <b>320.4 ± 38.5</b>   | <b>16.8 ± 4.3</b> | 19   |
| <b>SH-SY5Y</b>      | F1174L       | Non-amplified | <b>625.1 ± 55.7</b>   | <b>16.5 ± 1.2</b> | 38   |
| <b>NB-SD</b>        | F1174L       | Amplified     | <b>473.6 ± 119</b>    | <b>12.7 ± 1.3</b> | 38   |
| <b>COG-N-415</b>    | F1174L       | Amplified     | <b>379.5 ± 27.3</b>   | <b>14.6 ± 6.2</b> | 26   |
| <b>KELLY</b>        | F1174L       | Amplified     | <b>898.8 ± 33.5</b>   | <b>26.6 ± 1.2</b> | 34   |
| <b>Felix</b>        | F1245C       | Non-amplified | <b>814.0 ± 119</b>    | <b>21.8 ± 3.2</b> | 37   |
| <b>NB-1</b>         | Amplified wt | Amplified     | <b>256.4 ± 73.3</b>   | <b>5.2 ± 1.4</b>  | 49   |
| <b>NCI-H3122</b>    | EML4-ALK, v1 | Unknown       | <b>349.5 ± 25.3</b>   | <b>2.8 ± 0.4</b>  | 125  |
| <b>NB-EBc1</b>      | Wild-type    | Non-amplified | <b>3,841 ± 1081</b>   | <b>&gt;3,841</b>  | -    |
| <b>SK-N-BE(2)-C</b> | Wild-type    | Amplified     | <b>4,503 ± 58.6</b>   | <b>&gt;4,503</b>  | -    |

**Supplemental Table 1.**

**PF-06463922 is potent against ALK-mutated NB cell lines *in vitro*.**

Mean (n=3) IC<sub>50</sub> values (± SD) for crizotinib and PF-06463922 are listed for 10 NB cell lines harboring the indicated ALK aberrations, plus one NSCLC cell line (NCI-H3122). Fold increases in the IC<sub>50</sub> values with crizotinib over those measured for PF-06463922 are also listed in the right-most column.
