# Supplementary material
Source: PubMed Central journal article supplement (PMC4707106)

Figure S2

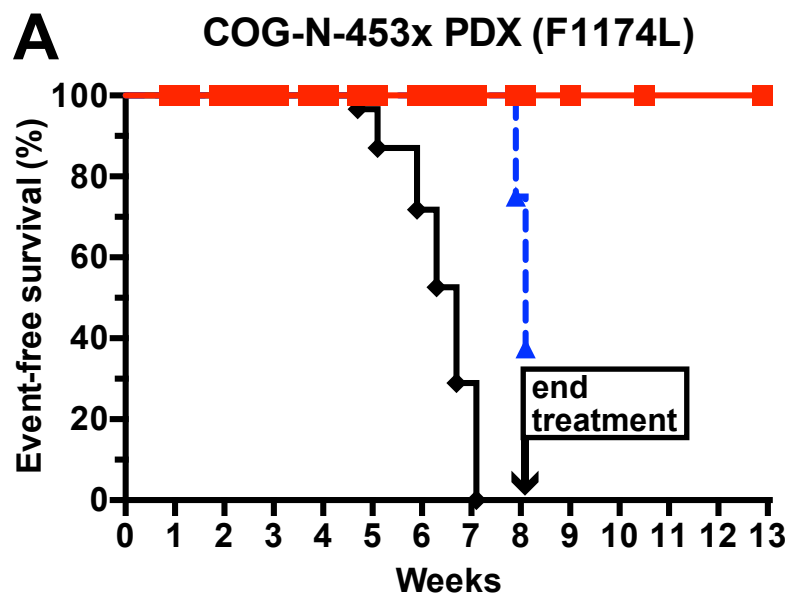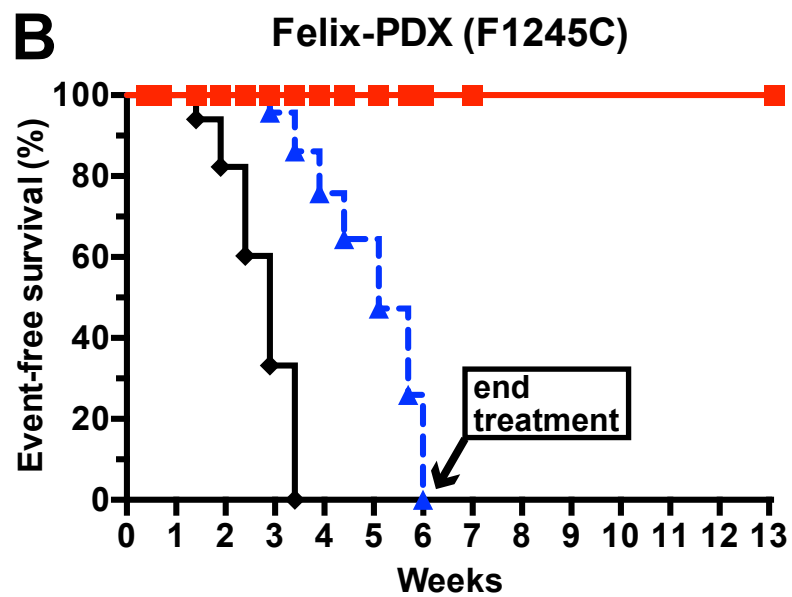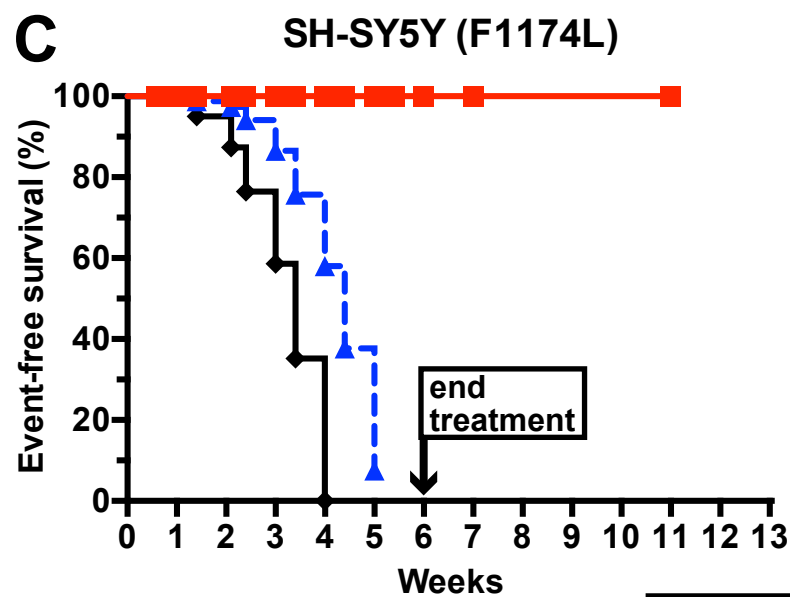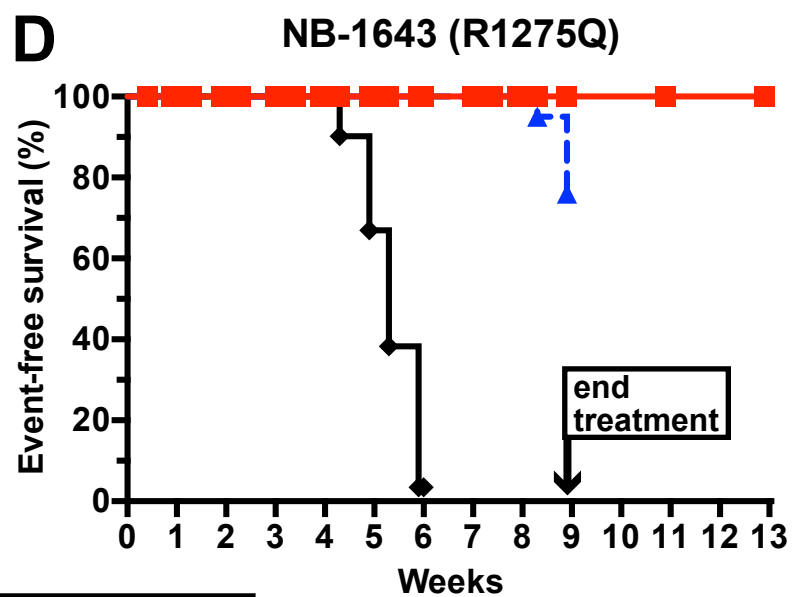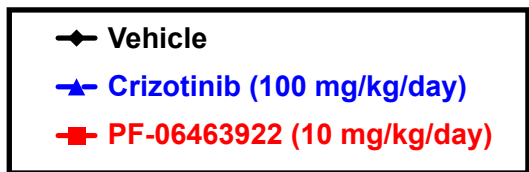

Supplement: NIHMS737610-supplement-3.pdf [file NIHMS737610-supplement-3.pdf]
